# Supplementary material
Source: MDPI journal article supplement (https://www.mdpi.com/2571-6255/6/2/75)
Supplement: s1 [file s1]

Archive with 4 entries (4 files):
- HistiricalFireKassandra.tif
- List of abbreviations.pdf
- Supplementary material S1.xlsx
- Supplementary material S2.xlsx
