# Supplementary material
Source: MDPI journal article supplement (https://www.mdpi.com/2571-6255/6/2/75)
Supplement: s1 [file s1 › List of abbreviations.pdf]

## LIST OF ABBREVIATIONS

| Abbreviation | Definition                           |
|--------------|--------------------------------------|
| AHP          | Analytic Hierarchy Process           |
| CC           | Canopy Cover                         |
| CR           | Consistency Ratio                    |
| CBH          | Crown Base Height                    |
| CBD          | Crown Bulk Density                   |
| CFWi         | Crown Fuel Weight                    |
| DBH          | Diameter at Breast Height            |
| DEM          | Digital Elevation Model              |
| FTH          | Fire Transmission to Houses          |
| FM           | Fuel Model                           |
| FTG          | Fuel Treatment Grid                  |
| GIS          | Geographical Information System      |
| GIS-MCDA     | GIS-Multi-Criteria Decision Analysis |
| GFS          | Greek Forest Service                 |
| LCP          | Gridded Landscape File               |
| IDW          | Inverse Distance Weighting           |
| OWN          | Land Ownership                       |
| MCDA         | Multicriteria Decisions Analysis     |
| PPFs         | Production Possibility Frontiers     |
| PNA          | Protected Natural Areas              |
| PRN          | Proximity to the Road Network        |
| PUD          | Proximity to Urban Development areas |
| ROS          | Rate of Spread                       |
| SLP          | Slope                                |
| PV           | Solar Photovoltaic Panels            |
| SPA          | Special Protection Areas             |
| SH           | Stand Height                         |
| SFM          | Suitable Fuel Models                 |
| MTT          | Minimum Travel Time                  |
| TOG          | Treatment Opportunity Grid           |
| TOM          | Treatment Optimization Model         |
| WUI          | Woodland-Urban Interface             |
