# Supplementary material
Source: MDPI journal article supplement (https://www.mdpi.com/2571-6255/6/2/75)
Supplement: s1 [file s1 › Supplementary material S1.xlsx]

## Sheet: Table S1-Fundamental scale
Intensity of Importance	Definition	Explanation
1	Equal importance	Two activities contribute equally to the objective
3	Weak importance of one over another	Experience and judgement slightly favour one activity over another
5	Essential or strong importance	Experience and judgement strongly favour one activity over another
7	Demostrated importance	An activity is favoured very strongly over another; its dominance demonstrated in practice
9	Absolute importance	The evidence favouring one activity over another is of the highest possible order of affirmation.
2,4,6,8	Intermediate values between the two adjacent judgments	When comromise is needed
Reciprocals of above non - zero	If activity i has one of the above non-zero numbers assigned to it when compared with activity j, then j has the reciprocal value when compared with i	A reasonable assumption
Rationals	Ratios arising from the scale	If consistency were to be forced by obtaining n numerical values to span the matrix

## Sheet: Table S2 -Comparison matrix 
		SFM	PRN	PUD	FTH
	SFM	1	5	3	1
	PRN	0.2	1	0.333333	0.2
	PUD	0.333333	3	1	1
	FTH	1	5	1	1
	sum	2.53333	14	5.33333	3.2
	Normalized Register Table
		SFM	PRN	PUD	FTH	Factor Weights	Product	Ratio
	SFM	0.394737	0.357143	0.5625	0.3125	0.40672	1.69831	4.17562
	PRN	0.0789474	0.0714286	0.0625	0.0625	0.068844	0.283271	4.11468
	PUD	0.131579	0.214286	0.1875	0.3125	0.211466	0.866541	4.09778
	FTH	0.394737	0.357143	0.1875	0.3125	0.31297	1.27538	4.07508
	sum	1	1	1	1	1
							Consistency Index (CI)	0.0385958
							Random Consistency Index (RI)	0.9
							Consistency Ratio (CR)	0.0428842
		SFM	PRN	PUD	FTH	Factor Weights
	SFM	1	5	3	1	0.40672
	PRN	0.2	1	0.2	0.2	0.068844
	PUD	0.333333	5	1	1	0.211466
	FTH	1	5	1	1	0.31297
	Consistency Ratio (CR) = 0.04

## Sheet: Table S3- Factor Weights
Calculated Factor Weights
	SFM	PRN	PUD	FTH	sum
Senario 1	0.25	0.25	0.25	0.25	1
Senario 2	0.40672	0.068844	0.211466	0.31297	1
