# Supplementary material
Source: MDPI journal article supplement (https://www.mdpi.com/2571-6255/6/2/75)
Supplement: s1 [file s1 › Supplementary material S2.xlsx]

## Sheet: Table S4-Suitability results 1
Fuel treatment intermediate suitability results for scenario 1
Class	PixelSum	Percentage %	Area [metre^2]	Area [Km^2]			Suitability class	Suitability index	Pixel sum	Area [Km^2]	Percentage %
0	16	0.0826745	287671	0.287671		Scenario 1	Low	0-10	258	4.63869	1.33313
2.5	1	0.00516716	17979.4	0.0179794			medium	11-30	3427	61.6155	17.7078
7.5	132	0.682065	2.37328e+06	2.37328			high	31-50	7847	141.085	40.5467
10	109	0.56322	1.95976e+06	1.95976			Very high	51-100	7821	140.617	40.4123
Sum low priority	258	1.33313	4.63869e+06	4.63869					19353	347.956	100
12.5	153	0.790575	2.75085e+06	2.75085
15	727	3.75652	1.3071e+07	13.071
17.5	30	0.155015	539383	0.539383
20	947	4.8933	1.70265e+07	17.0265
22.5	289	1.49331	5.19606e+06	5.19606
25	521	2.69209	9.36728e+06	9.36728
27.5	721	3.72552	1.29632e+07	12.9632
30	39	0.201519	701198	0.701198
Sum medium priority	3427	17.7078	6.16155e+07	61.6155
32.5	1533	7.92125	2.75625e+07	27.5625
35	257	1.32796	4.62071e+06	4.62071
37.5	1057	5.46169	1.90043e+07	19.0043
40	1498	7.7404	2.69332e+07	26.9332
42.5	3	0.0155015	53938.3	0.0539383
45	1946	10.0553	3.4988e+07	34.988
47.5	239	1.23495	4.29708e+06	4.29708
50	1314	6.78965	2.3625e+07	23.625
Sum high priority	7847	40.5467	1.41085e+08	141.085
52.5	819	4.2319	1.47252e+07	14.7252
57.5	2094	10.82	3.76489e+07	37.6489
60	13	0.067173	233733	0.233733
62.5	1343	6.93949	2.41464e+07	24.1464
65	643	3.32248	1.15608e+07	11.5608
70	1032	5.33251	1.85548e+07	18.5548
75	907	4.68661	1.63073e+07	16.3073
77.5	19	0.098176	341609	0.341609
82.5	457	2.36139	8.2166e+06	8.2166
87.5	399	2.0617	7.17379e+06	7.17379
100	95	0.49088	1.70805e+06	1.70805
Sum very high priority	7821	40.4123	1.40617e+08	140.617
Total sums	19353	100	3.47956e+08	347.956

## Sheet: Table S5-Suitability results 2
Fuel treatment intermediate suitability results for scenario 2
Class	PixelSum	Percentage %	Area [metre^2]	Area [Km^2]				Suitability class	Suitability index	Pixel sum	Area [Km^2]	Percentage %
0	16	0.0826745	287671	0.287671			Scenario 2	Low	0 <=10	755	13.5745	3.9012
2.1	48	0.248024	863013	0.863013				medium	>10 & <=30	4752	85.4383	24.5543
3.5	25	0.129179	449486	0.449486				high	30.01 <=50	5303	95.3449	27.4014
4.2	4	0.0206686	71917.7	0.0719177				Very high	50.01 <=100	8543	153.598	44.143
5.6	2	0.0103343	35958.9	0.0359589						19353	347.956	100
6.3	46	0.237689	827054	0.827054
7	111	0.573554	1.99572e+06	1.99572
8.4	342	1.76717	6.14897e+06	6.14897
9.1	3	0.0155015	53938.3	0.0539383
9.3	39	0.201519	701198	0.701198
9.8	107	0.552886	1.9238e+06	1.9238
10	12	0.0620059	215753	0.215753
Sum low priority	755	3.9012	1.35745e+07	13.5745
10.5	84	0.434041	1.51027e+06	1.51027
11.2	136	0.702733	2.4452e+06	2.4452
11.4	199	1.02826	3.57791e+06	3.57791
12.6	441	2.27872	7.92893e+06	7.92893
12.8	119	0.614892	2.13955e+06	2.13955
13.3	79	0.408205	1.42038e+06	1.42038
13.5	2	0.0103343	35958.9	0.0359589
14	218	1.12644	3.91952e+06	3.91952
14.9	1	0.00516716	17979.4	0.0179794
15.5	44	0.227355	791095	0.791095
15.6	19	0.098176	341609	0.341609
16.2	20	0.103343	359589	0.359589
16.3	149	0.769906	2.67894e+06	2.67894
17.5	171	0.883584	3.07448e+06	3.07448
17.6	215	1.11094	3.86558e+06	3.86558
17.7	112	0.578722	2.0137e+06	2.0137
18.4	3	0.0155015	53938.3	0.0539383
18.6	1	0.00516716	17979.4	0.0179794
19	92	0.475378	1.65411e+06	1.65411
19.1	51	0.263525	916951	0.916951
19.7	13	0.067173	233733	0.233733
19.8	32	0.165349	575342	0.575342
20.5	116	0.59939	2.08561e+06	2.08561
21	112	0.578722	2.0137e+06	2.0137
21.1	14	0.0723402	251712	0.251712
21.7	86	0.444376	1.54623e+06	1.54623
21.8	18	0.0930088	323630	0.32363
21.9	245	1.26595	4.40496e+06	4.40496
22.1	2	0.0103343	35958.9	0.0359589
22.5	139	0.718235	2.49914e+06	2.49914
22.6	59	0.304862	1.06079e+06	1.06079
22.8	1	0.00516716	17979.4	0.0179794
23.1	542	2.8006	9.74485e+06	9.74485
23.3	92	0.475378	1.65411e+06	1.65411
23.9	46	0.237689	827054	0.827054
24.5	291	1.50364	5.23201e+06	5.23201
24.6	8	0.0413373	143835	0.143835
24.7	17	0.0878417	305650	0.30565
24.9	2	0.0103343	35958.9	0.0359589
25.3	26	0.134346	467465	0.467465
25.6	1	0.00516716	17979.4	0.0179794
26	20	0.103343	359589	0.359589
26.1	11	0.0568387	197774	0.197774
26.3	1	0.00516716	17979.4	0.0179794
26.7	75	0.387537	1.34846e+06	1.34846
26.8	87	0.449543	1.56421e+06	1.56421
27.5	1	0.00516716	17979.4	0.0179794
27.9	1	0.00516716	17979.4	0.0179794
28	261	1.34863	4.69263e+06	4.69263
28.1	127	0.656229	2.28339e+06	2.28339
28.6	1	0.00516716	17979.4	0.0179794
28.8	36	0.186018	647260	0.64726
28.9	38	0.196352	683218	0.683218
29.5	64	0.330698	1.15068e+06	1.15068
29.6	9	0.0465044	161815	0.161815
30	2	0.0103343	35958.9	0.0359589
Sum medium priority	4752	24.5543	8.54383e+07	85.4383
30.3	150	0.775074	2.69691e+06	2.69691
31	175	0.904253	3.1464e+06	3.1464
31.7	119	0.614892	2.13955e+06	2.13955
31.9	4	0.0206686	71917.7	0.0719177
32.4	833	4.30424	1.49769e+07	14.9769
33	63	0.325531	1.1327e+06	1.1327
33.1	268	1.3848	4.81849e+06	4.81849
33.8	378	1.95319	6.79622e+06	6.79622
34	37	0.191185	665239	0.665239
34.5	159	0.821578	2.85873e+06	2.85873
34.9	2	0.0103343	35958.9	0.0359589
35.4	20	0.103343	359589	0.359589
35.6	1	0.00516716	17979.4	0.0179794
36.1	10	0.0516716	179794	0.179794
36.5	124	0.640728	2.22945e+06	2.22945
36.6	1	0.00516716	17979.4	0.0179794
36.8	3	0.0155015	53938.3	0.0539383
37.2	95	0.49088	1.70805e+06	1.70805
37.3	323	1.66899	5.80736e+06	5.80736
38	204	1.0541	3.6678e+06	3.6678
38.1	17	0.0878417	305650	0.30565
38.2	11	0.0568387	197774	0.197774
38.6	539	2.7851	9.69091e+06	9.69091
38.9	10	0.0516716	179794	0.179794
39.4	19	0.098176	341609	0.341609
39.6	18	0.0930088	323630	0.32363
40	253	1.30729	4.5488e+06	4.5488
40.1	1	0.00516716	17979.4	0.0179794
40.2	66	0.341032	1.18664e+06	1.18664
40.3	6	0.0310029	107877	0.107877
40.8	27	0.139513	485445	0.485445
41.5	16	0.0826745	287671	0.287671
41.6	35	0.180851	629280	0.62928
41.8	1	0.00516716	17979.4	0.0179794
42.2	31	0.160182	557362	0.557362
42.3	23	0.118845	413527	0.413527
42.4	14	0.0723402	251712	0.251712
42.6	7	0.0361701	125856	0.125856
43.1	22	0.113677	395547	0.395547
43.5	234	1.20911	4.20719e+06	4.20719
43.6	94	0.485713	1.69007e+06	1.69007
43.8	9	0.0465044	161815	0.161815
44.3	20	0.103343	359589	0.359589
44.4	63	0.325531	1.1327e+06	1.1327
44.7	13	0.067173	233733	0.233733
45	53	0.273859	952910	0.95291
45.1	34	0.175683	611301	0.611301
45.2	3	0.0155015	53938.3	0.0539383
45.3	1	0.00516716	17979.4	0.0179794
45.8	59	0.304862	1.06079e+06	1.06079
46.1	10	0.0516716	179794	0.179794
46.5	17	0.0878417	305650	0.30565
46.6	2	0.0103343	35958.9	0.0359589
47.3	102	0.52705	1.8339e+06	1.8339
48	8	0.0413373	143835	0.143835
48.5	52	0.268692	934930	0.93493
48.6	77	0.397871	1.38442e+06	1.38442
48.8	5	0.0258358	89897.2	0.0898972
49.3	45	0.232522	809074	0.809074
49.4	271	1.4003	4.87243e+06	4.87243
49.6	12	0.0620059	215753	0.215753
50	34	0.175683	611301	0.611301
Sum high priority	5303	27.4014	9.53449e+07	95.3449
50.1	7	0.0361701	125856	0.125856
50.8	197	1.01793	3.54195e+06	3.54195
50.9	18	0.0930088	323630	0.32363
51.5	100	0.516716	1.79794e+06	1.79794
52	107	0.552886	1.9238e+06	1.9238
52.2	6	0.0310029	107877	0.107877
52.3	5	0.0258358	89897.2	0.0898972
52.7	138	0.713068	2.48116e+06	2.48116
52.9	105	0.542552	1.88784e+06	1.88784
53.5	26	0.134346	467465	0.467465
53.6	370	1.91185	6.65239e+06	6.65239
54.1	592	3.05896	1.06438e+07	10.6438
54.3	194	1.00243	3.48801e+06	3.48801
54.5	2	0.0103343	35958.9	0.0359589
55	239	1.23495	4.29708e+06	4.29708
55.5	314	1.62249	5.64554e+06	5.64554
55.7	5	0.0258358	89897.2	0.0898972
55.8	5	0.0258358	89897.2	0.0898972
55.9	2	0.0103343	35958.9	0.0359589
56.6	25	0.129179	449486	0.449486
57	15	0.0775074	269691	0.269691
57.1	2	0.0103343	35958.9	0.0359589
57.3	1	0.00516716	17979.4	0.0179794
57.7	4	0.0206686	71917.7	0.0719177
57.8	43	0.222188	773116	0.773116
58.5	209	1.07994	3.7577e+06	3.7577
58.6	2	0.0103343	35958.9	0.0359589
58.7	185	0.955924	3.32619e+06	3.32619
59	242	1.25045	4.35102e+06	4.35102
59.1	111	0.573554	1.99572e+06	1.99572
59.4	1	0.00516716	17979.4	0.0179794
59.9	50	0.258358	898972	0.898972
60.1	91	0.470211	1.63613e+06	1.63613
60.5	62	0.320364	1.11472e+06	1.11472
60.6	1	0.00516716	17979.4	0.0179794
60.7	14	0.0723402	251712	0.251712
60.8	35	0.180851	629280	0.62928
61.3	51	0.263525	916951	0.916951
61.5	4	0.0206686	71917.7	0.0719177
62	82	0.423707	1.47431e+06	1.47431
62.1	11	0.0568387	197774	0.197774
62.8	24	0.124012	431506	0.431506
62.9	202	1.04377	3.63185e+06	3.63185
63.5	4	0.0206686	71917.7	0.0719177
63.6	71	0.366868	1.27654e+06	1.27654
64	30	0.155015	539383	0.539383
64.1	352	1.81884	6.32876e+06	6.32876
64.3	75	0.387537	1.34846e+06	1.34846
64.8	41	0.211853	737157	0.737157
64.9	125	0.645895	2.24743e+06	2.24743
65	1	0.00516716	17979.4	0.0179794
65.5	239	1.23495	4.29708e+06	4.29708
65.6	4	0.0206686	71917.7	0.0719177
66.3	74	0.38237	1.33048e+06	1.33048
66.4	10	0.0516716	179794	0.179794
67	36	0.186018	647260	0.64726
67.8	72	0.372035	1.29452e+06	1.29452
69	197	1.01793	3.54195e+06	3.54195
69.1	148	0.764739	2.66096e+06	2.66096
69.8	36	0.186018	647260	0.64726
70.5	87	0.449543	1.56421e+06	1.56421
71.3	80	0.413373	1.43835e+06	1.43835
72	4	0.0206686	71917.7	0.0719177
72.5	29	0.149848	521403	0.521403
73.2	8	0.0413373	143835	0.143835
73.4	444	2.29422	7.98287e+06	7.98287
74	64	0.330698	1.15068e+06	1.15068
74.1	1	0.00516716	17979.4	0.0179794
74.6	115	0.594223	2.06763e+06	2.06763
74.8	238	1.22978	4.2791e+06	4.2791
76	71	0.366868	1.27654e+06	1.27654
77.5	76	0.392704	1.36644e+06	1.36644
77.6	1	0.00516716	17979.4	0.0179794
78.2	8	0.0413373	143835	0.143835
78.3	185	0.955924	3.32619e+06	3.32619
79	7	0.0361701	125856	0.125856
79.5	51	0.263525	916951	0.916951
79.6	408	2.1082	7.33561e+06	7.33561
80.4	84	0.434041	1.51027e+06	1.51027
81	224	1.15744	4.02739e+06	4.02739
81.8	36	0.186018	647260	0.64726
82.5	15	0.0775074	269691	0.269691
84.5	184	0.950757	3.30822e+06	3.30822
84.6	61	0.315197	1.09675e+06	1.09675
85.3	39	0.201519	701198	0.701198
86	50	0.258358	898972	0.898972
89.5	23	0.118845	413527	0.413527
93	29	0.149848	521403	0.521403
93.7	19	0.098176	341609	0.341609
95.1	252	1.30212	4.53082e+06	4.53082
96.5	141	0.728569	2.5351e+06	2.5351
100	95	0.49088	1.70805e+06	1.70805
Sum very high priority	8543	44.143	1.53598e+08	153.598
Total sums	19353	100	3.47956e+08	347.956

## Sheet: Table S6-Optimization results 1
Fuel treatment spatial optimization results for scenario 1
Class	PixelSum	Percentage %	Area [metre^2]	Area (km^2)	Percentage %
0	15649	80.9445	2.8136e+08	281.36	80.9445
20	3	0.0155175	53938.3
25	2	0.010345	35958.9
27.5	23	0.118968	413527	0.503424	0.14483
32.5	44	0.22759	791095
35	31	0.160348	557362
37.5	58	0.300005	1.04281e+06
40	195	1.00864	3.50599e+06
42.5	1	0.0051725	17979.4
45	361	1.86727	6.49057e+06
47.5	130	0.672425	2.33733e+06
50	183	0.946568	3.29024e+06	18.0334	5.18802
52.5	314	1.62417	5.64554e+06
57.5	509	2.6328	9.15153e+06
60	3	0.0155175	53938.3
62.5	323	1.67072	5.80736e+06
65	275	1.42244	4.94434e+06
70	480	2.4828	8.63013e+06
75	307	1.58796	5.51969e+06
82.5	227	1.17416	4.08133e+06
87.5	179	0.925878	3.21832e+06
100	36	0.18621	647260	47.6994	13.7227
		100	3.47596e+08	66.2362	100

## Sheet: Table S7-Optimization results 2
Fuel treatment spatial optimization results for scenario 2
Class	PixelSum	Percentage %	Area [metre^2]	area km^2	Percentage %
0	15649	80.9445	2.8136e+08	281.36	80.9445	Excluded
26.8	3	0.0155175	53938.3
28.9	18	0.0931051	323630	0.377568	0.108623	Low
30.3	6	0.031035	107877
31	2	0.010345	35958.9
33.1	1	0.0051725	17979.4
33.8	2	0.010345	35958.9
34.5	6	0.031035	107877
38	2	0.010345	35958.9
38.1	3	0.0155175	53938.3
40.2	25	0.129313	449486
41.5	2	0.010345	35958.9
41.6	11	0.0568975	197774
42.3	3	0.0155175	53938.3
42.4	3	0.0155175	53938.3
43.1	2	0.010345	35958.9
43.6	1	0.0051725	17979.4
44.4	27	0.139658	485445
45	1	0.0051725	17979.4
45.1	9	0.0465525	161815
45.2	3	0.0155175	53938.3
45.8	15	0.0775875	269691
46.5	4	0.02069	71917.7
46.6	1	0.0051725	17979.4
47.3	34	0.175865	611301
48	3	0.0155175	53938.3
48.6	18	0.0931051	323630
49.3	12	0.06207	215753
49.4	140	0.72415	2.51712e+06
50	7	0.0362075	125856	6.16694	1.77417	Medium
50.1	4	0.02069	71917.7
50.8	100	0.51725	1.79794e+06
51.5	46	0.237935	827054
52.2	2	0.010345	35958.9
52.9	26	0.134485	467465
53.5	3	0.0155175	53938.3
53.6	183	0.946568	3.29024e+06
54.3	82	0.424145	1.47431e+06
55	107	0.553458	1.9238e+06
55.7	3	0.0155175	53938.3
56.6	10	0.051725	179794
57	2	0.010345	35958.9
57.3	1	0.0051725	17979.4
57.8	22	0.113795	395547
58.5	98	0.506905	1.76198e+06
58.6	1	0.0051725	17979.4
58.7	114	0.589665	2.04966e+06
59.1	27	0.139658	485445
59.9	35	0.181038	629280
60.1	41	0.212073	737157
60.5	16	0.08276	287671
60.7	8	0.04138	143835
60.8	10	0.051725	179794
61.3	40	0.2069	719177
61.5	3	0.0155175	53938.3
62	38	0.196555	683218
62.1	1	0.0051725	17979.4
62.8	12	0.06207	215753
62.9	119	0.615528	2.13955e+06
63.5	2	0.010345	35958.9
63.6	34	0.175865	611301
64	5	0.0258625	89897.2
64.1	136	0.70346	2.4452e+06
64.3	32	0.16552	575342
64.8	27	0.139658	485445
64.9	78	0.403455	1.4024e+06
65.5	101	0.522423	1.81592e+06
65.6	2	0.010345	35958.9
66.3	46	0.237935	827054
67	26	0.134485	467465
67.8	33	0.170693	593321
69	83	0.429318	1.49229e+06
69.1	84	0.43449	1.51027e+06
69.8	19	0.0982776	341609
70.5	43	0.222418	773116
71.3	35	0.181038	629280
72	1	0.0051725	17979.4
72.5	18	0.0931051	323630
73.4	181	0.936223	3.25428e+06
74	28	0.14483	503424
74.1	1	0.0051725	17979.4
74.6	55	0.284488	988869
74.8	96	0.49656	1.72603e+06
76	34	0.175865	611301
77.5	34	0.175865	611301
78.3	86	0.444835	1.54623e+06
79	2	0.010345	35958.9
79.5	30	0.155175	539383
79.6	187	0.967258	3.36215e+06
80.4	58	0.300005	1.04281e+06
81	115	0.594838	2.06763e+06
81.8	28	0.14483	503424
82.5	10	0.051725	179794
84.5	79	0.408628	1.42038e+06
84.6	33	0.170693	593321
85.3	25	0.129313	449486
86	29	0.150003	521403
89.5	15	0.0775875	269691
93	13	0.0672425	233733
95.1	131	0.677598	2.35531e+06
96.5	55	0.284488	988869
100	36	0.18621	647260	59.6917	17.1727	High
		100	3.47596e+08	347.596	100
