# Supplementary material
Source: MDPI journal article supplement (https://www.mdpi.com/2571-6255/6/2/75)

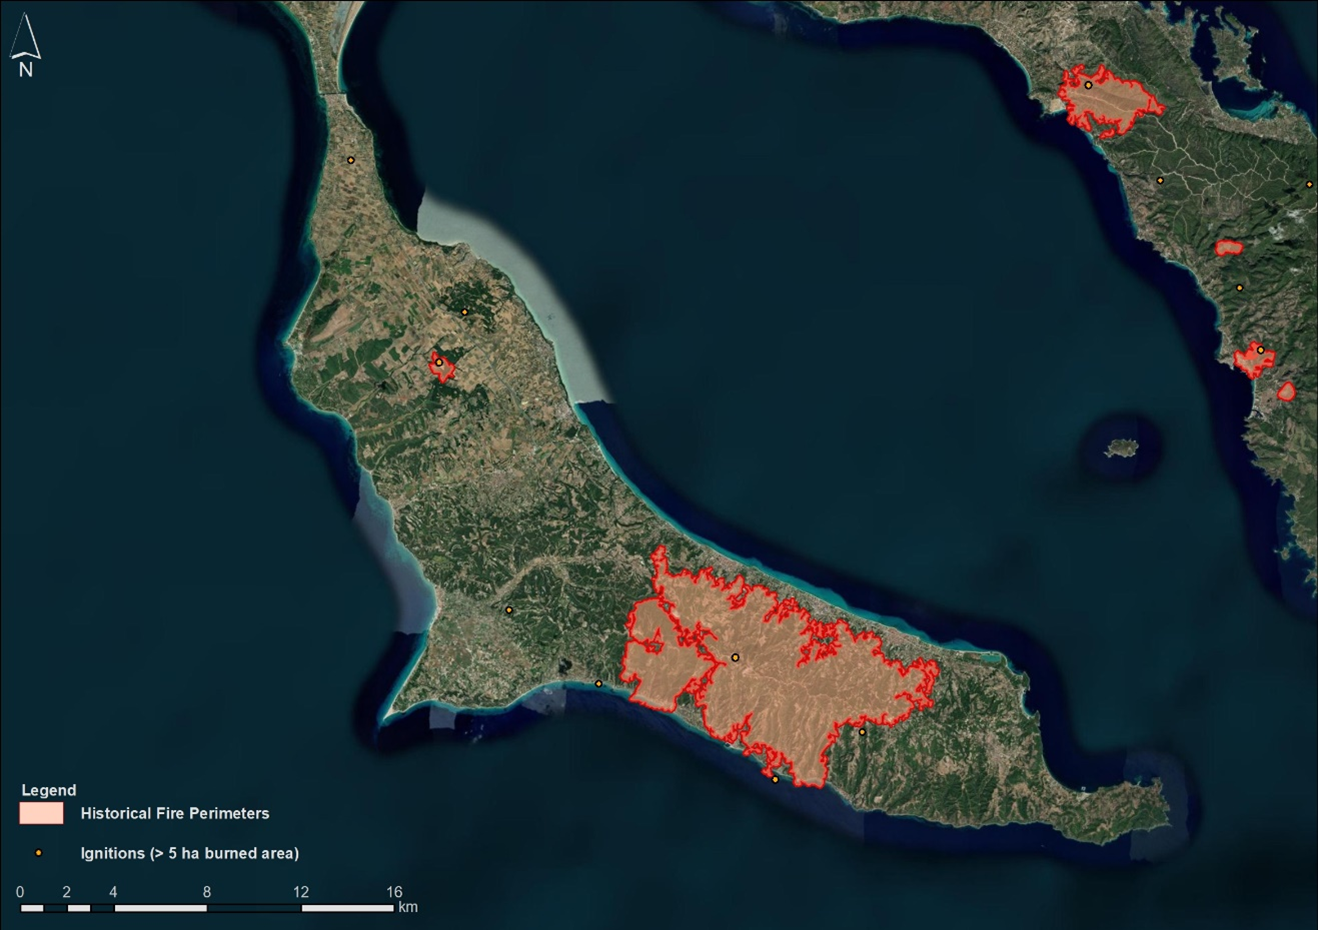

Supplement: s1 [file s1 › HistiricalFireKassandra.tif]
